# Supplementary figures and images for: The Taxonomically Richest Liverwort Hemiboreal Flora in Eurasia Is in the South Kurils
Source: MDPI journal article supplement (doi:10.3390/plants11172200), 2022-08-25

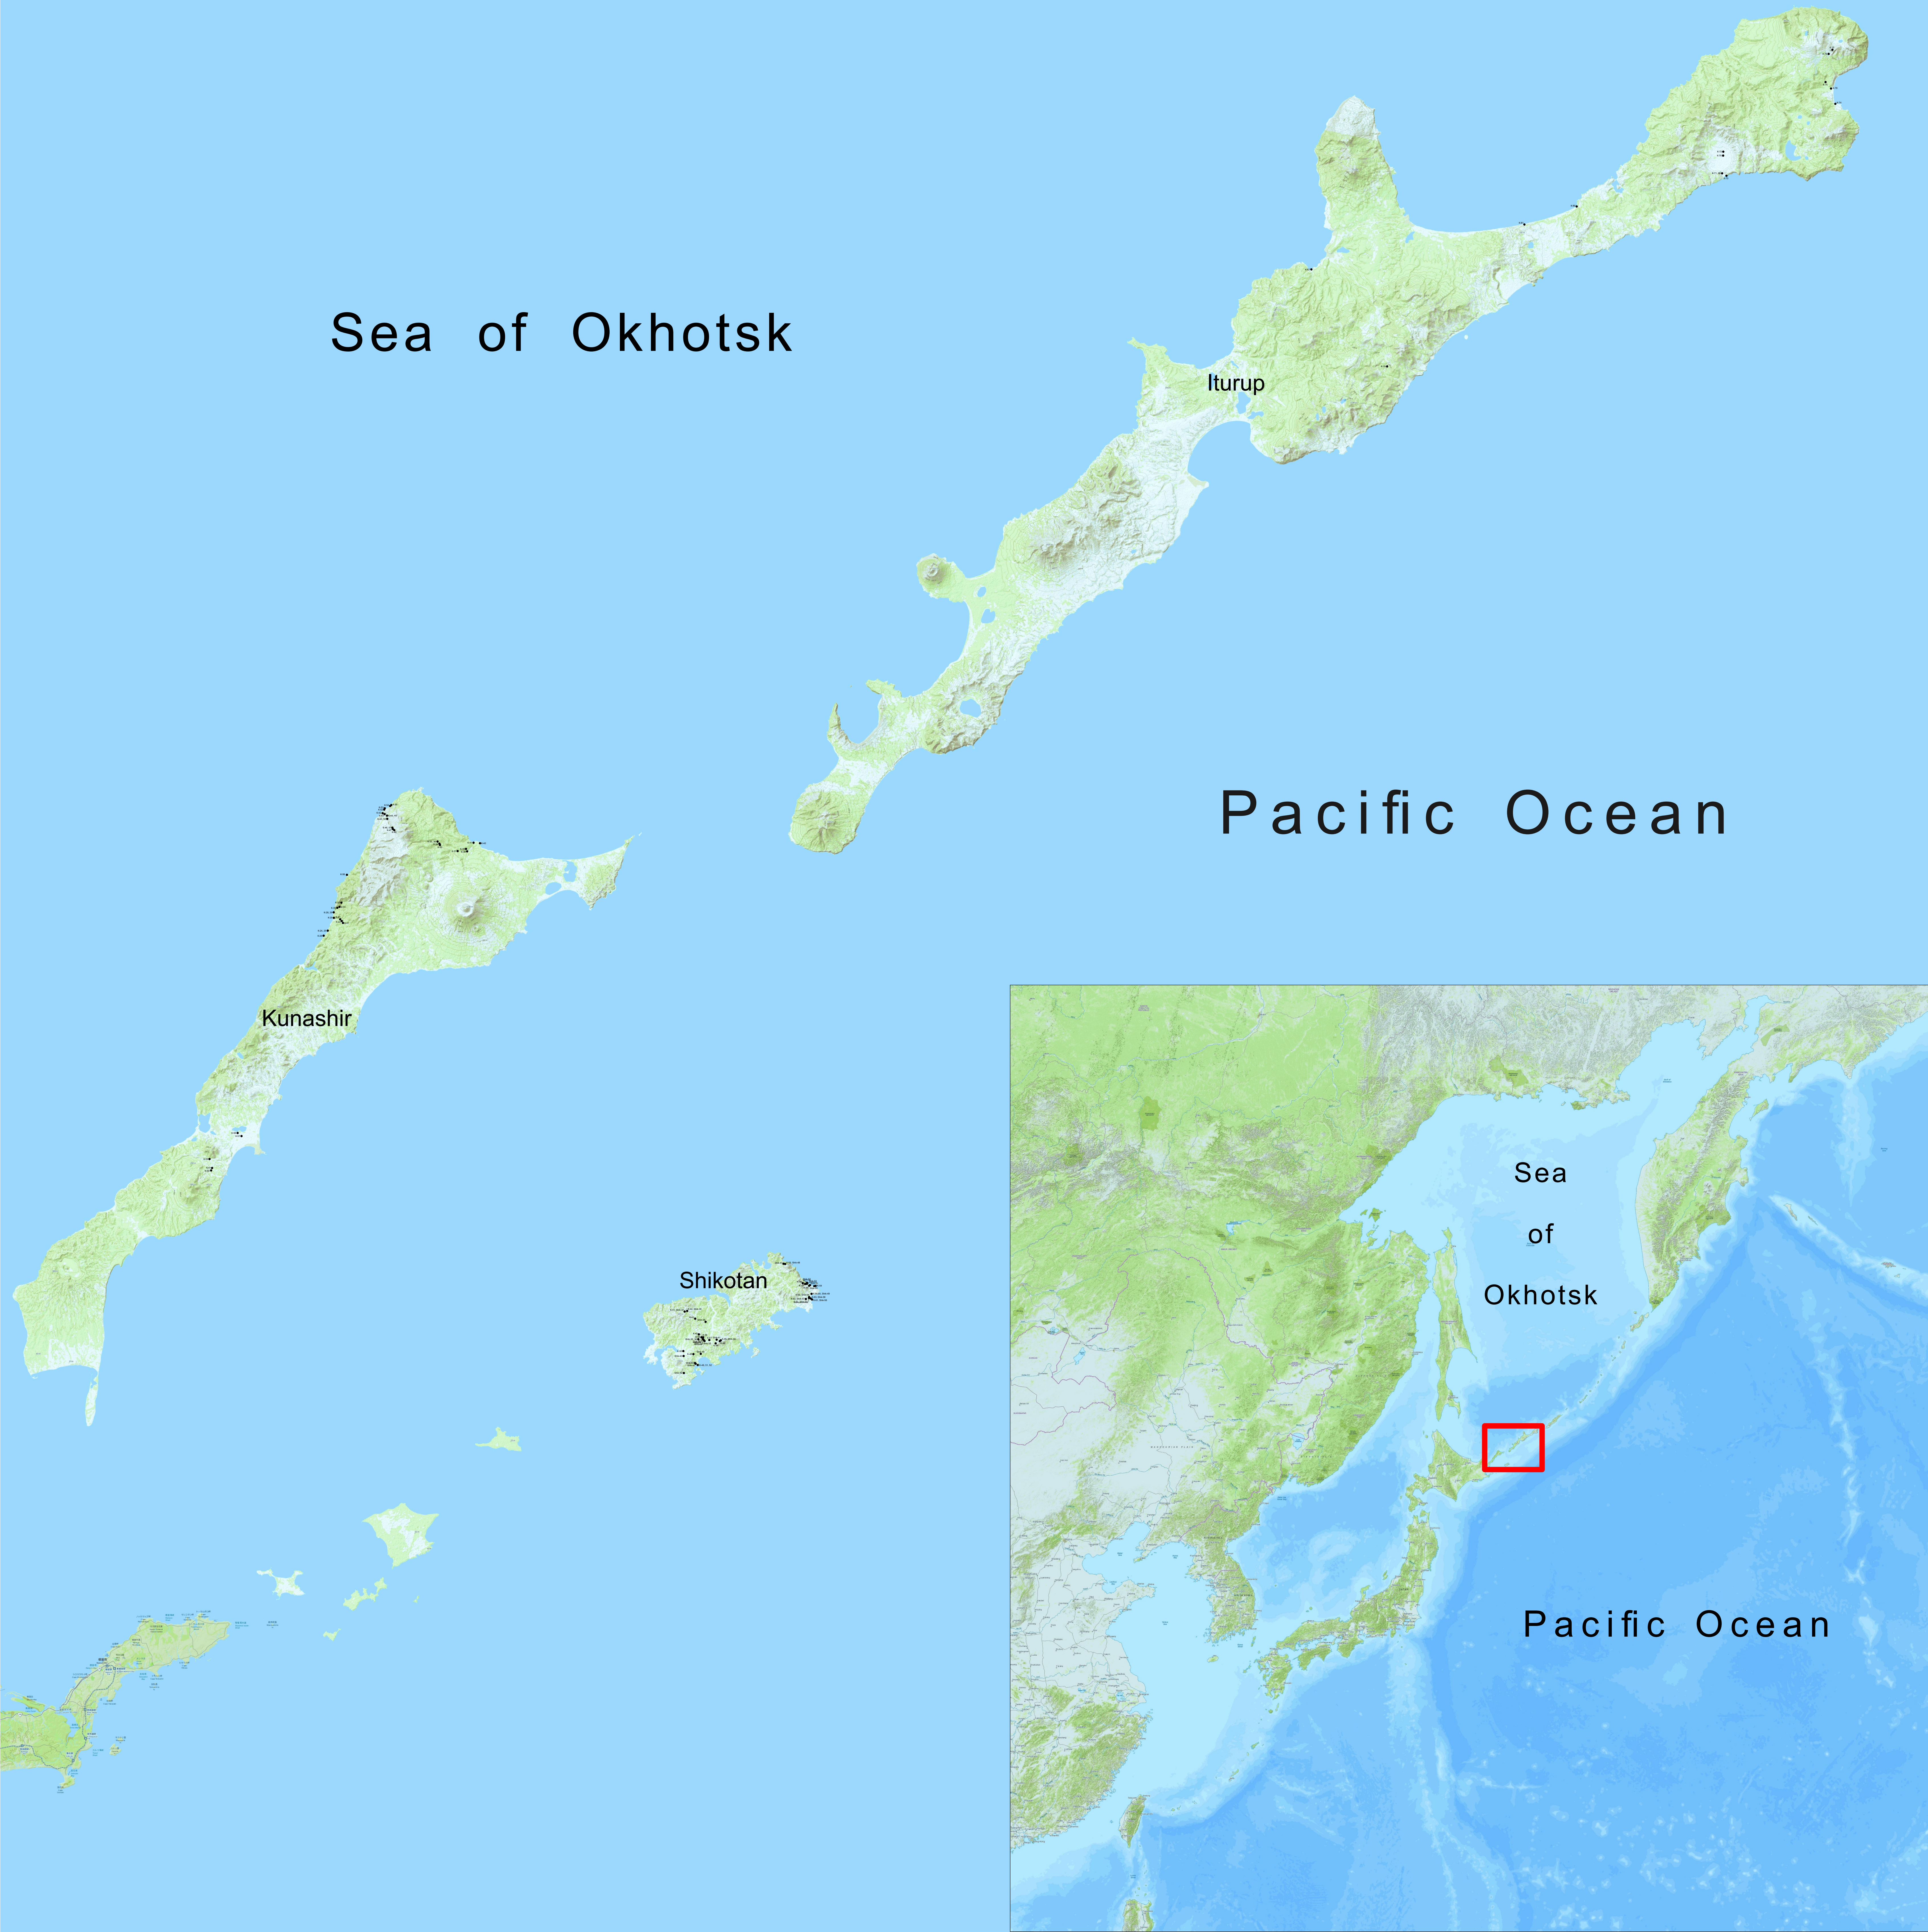

Supplement: s1 [file s1]
